# Plasma ropivacaine concentrations after ultrasound-guided transversus abdominis plane block

J. D. Griffiths<sup>1\*</sup>, F. A. Barron<sup>1</sup>, S. Grant<sup>1</sup>, A. R. Bjorksten<sup>2</sup>, P. Hebbard<sup>3</sup> and C. F. Royse<sup>3</sup>

<sup>1</sup> Department of Anaesthesia, Royal Women's Hospital, Flemington Road, Parkville, VIC 3052, Australia

<sup>2</sup> Department of Anaesthesia and Pain Management, Royal Melbourne Hospital, Victoria, Australia

<sup>3</sup> Anaesthesia and Pain Management Unit, Department of Pharmacology, University of Melbourne, Victoria, Australia

\* Corresponding author. E-mail: james.griffiths@thewomens.org.au

## Key points

- Transversus abdominis plane (TAP) block involves injection of a large volume of local anaesthetic.
- TAP blocks using 3 mg kg<sup>-1</sup> of ropivacaine result in venous plasma concentrations that are potentially neurotoxic.
- Ropivacaine levels peak at 30 min and remain high for several hours in some patients.

**Background.** The transversus abdominis plane block is a novel technique involving injection of local anaesthetic between the internal oblique and the transversus abdominis muscles of the abdominal wall. It is possible that injection of a large dose of local anaesthetic into a relatively vascular plane may result in toxic concentrations. One previously published study examined plasma lidocaine concentrations after transversus abdominis plane block and showed potentially toxic plasma concentrations. Although ropivacaine is most commonly used for this technique, plasma concentrations of ropivacaine after this block have not been reported previously.

**Methods.** Adult female patients undergoing elective open gynaecological surgery received bilateral ultrasound-guided transverse abdominal plane blocks before surgical incision (3 mg kg<sup>-1</sup> of ropivacaine diluted to 40 ml). Venous blood was collected each 15 min for the first hour, each 30 min for the second hour, and then at 3, 4, 12, and 24 h post-block.

**Results.** Twenty-eight patients were recruited. The mean (SD) peak total ropivacaine concentration occurred 30 min post-injection and was 2.54 (SD 0.75) µg ml<sup>-1</sup>. The highest measured concentration was 4.00 µg ml<sup>-1</sup>, also 30 min post-injection. Mean total concentrations remained above 2.20 µg ml<sup>-1</sup> for up to 90 min post-injection. The mean unbound peak venous concentration was 0.14 (0.05) µg ml<sup>-1</sup>, and the peak was 0.25 µg ml<sup>-1</sup>.

**Conclusions.** Transversus abdominis plane block using 3 mg kg<sup>-1</sup> of ropivacaine produces venous plasma concentrations that are potentially neurotoxic, although broadly consistent with plasma levels found after injection at other comparable sites.

**Keywords:** anaesthetic techniques, regional; anaesthetics local, ropivacaine; toxicity, local anaesthetics

Accepted for publication: 13 July 2010

The transversus abdominis plane (TAP) block is a newly described regional technique involving injection of local anaesthetic between the internal oblique and the transversus abdominis muscles of the abdominal wall. It has been shown in several clinical trials to be effective in reducing morphine consumption and improving postoperative pain relief.<sup>1–5</sup> The technique generally involves the injection of a large dose of local anaesthetic in the form of a single high-volume bolus into a relatively vascular plane. Potentially toxic plasma concentrations of local anaesthetic have been described after similar techniques, such as intercostal block.<sup>6</sup> Only one study has been previously published examining plasma local anaesthetic concentrations after TAP block<sup>7</sup> and showed that potentially toxic plasma concentrations of lidocaine were reached within 15 min after injection. Although ropivacaine is a much more commonly used local anaesthetic for TAP block, plasma ropivacaine concentrations after TAP block have not previously been reported.

This observational study aimed to quantify peak and mean venous plasma concentrations after ultrasound-guided TAP block using ropivacaine 3 mg kg<sup>-1</sup> and to measure the time course of plasma concentration over 24 h after injection.

## Methods

After institutional Human Ethics and Research Committee approval and informed written consent, female patients more than 18 yr of age undergoing elective open major gynaecological surgery and who were planned to receive TAP blocks were included. Patients were excluded if they had any allergy/sensitivity to local anaesthetic, significant renal or liver dysfunction, or were pregnant.

General anaesthesia was induced with fentanyl 1–2 µg kg<sup>-1</sup>, propofol 2–3 mg kg<sup>-1</sup>, a neuromuscular blocking agent of the treating anaesthetist's choice, paracetamol

1 g, and morphine 0.05–0.2 mg kg<sup>-1</sup> i.v. Anaesthesia was maintained with sevoflurane. Bilateral ultrasound-guided TAP blocks were performed after induction of general anaesthesia, before surgical incision. Blocks were performed by a study investigator (or by a senior trainee experienced in the technique, under the direct supervision of a study investigator). Images were obtained using a Sonosite M-Turbo<sup>®</sup> ultrasound machine (Sonosite Inc., Bothell, WA, USA) with an L38x 10–5 MHz 38 mm broadband linear array probe. Blocks were performed with a 150 mm Stimuplex<sup>®</sup> needle (B-Braun Medical, Bethlehem, PA, USA) using an in-plane approach. Participants received a total dose of 3 mg kg<sup>-1</sup> of ropivacaine (Naropin<sup>®</sup>, AstraZeneca, London, UK) diluted with 0.9% saline to a total volume of 40 ml (20 ml each side). The dose of ropivacaine of 3 mg kg<sup>-1</sup> has been used in previous studies, demonstrating the efficacy of the TAP block.<sup>4</sup> The injections were performed midway between the costal margin and the iliac crest, between the junction of the anterior and middle thirds of the iliac crest. Postoperative analgesia included patient-controlled i.v. morphine, paracetamol and diclofenac.

After induction of anaesthesia, blood samples were obtained by aspiration from a large bore venous cannula, specifically placed in the antecubital fossa on the contralateral side to the cannula used for administering fluids and medications. Venous blood samples were obtained each 15 min for the first hour, each 30 min for the second hour, and then at 3, 4, 12, and 24 h after injection.

Assays were performed using a Shimadzu GC-17A gas chromatograph (Kyoto, Japan) equipped with a nitrogen-phosphorus detector and programmable temperature vaporizer and running a 25 m × 0.25 mm SGE BPX-5 column (Melbourne, Victoria, Australia).

For total plasma concentration, 400 µl of plasma was added to a screw-capped borosilicate tube along with 50 µl mepivacaine 150 mg litre<sup>-1</sup> and 50 µl KOH 3 M and extracted with 3 ml ethyl acetate. After vortex mixing and centrifugation, the ethyl acetate layer was transferred to a second borosilicate tube and evaporated to dryness under N<sub>2</sub> at 40°C. The residue was reconstituted in 100 µl of methanol and 6 µl injected into the gas chromatograph. The peak area ratio of ropivacaine to the mepivacaine internal standard was used to quantify the concentration of each plasma sample against a standard curve run with each batch. Unbound concentrations were determined after a single ultrafiltration of a single sample with Amicon (a trademark of Millipore, Carrigtwohill, Co., Cork, Ireland) Ultra 3K centrifugal filters. The extraction was similar except that 200 µl of ultrafiltrate was used and the KOH reduced to 25 µl. After reconstituting in 100 µl methanol, the sample was again evaporated to dryness under N<sub>2</sub> (at room temperature), reconstituted in 50 µl methanol, and 24 µl injected into the gas chromatograph. The method is linear to at least 20 mg litre<sup>-1</sup> with a within-day coefficient of variation of <5% at 1 mg litre<sup>-1</sup> on each analysis day. The limit of quantitation was 20 µg litre<sup>-1</sup> for total levels and 5 µg litre<sup>-1</sup> for unbound levels.

## Sample size estimation

The sample size estimation was based on reported plasma levels with the potential for early neurotoxicity [2.2 (0.9) µg ml<sup>-1</sup>] compared with scalp blocks as an exemplar of relatively high blood flow tissue block. For scalp blocks, peak plasma concentrations of mean 1.6 (0.6) µg ml<sup>-1</sup> have been reported.<sup>8</sup> Using two-tailed analysis,  $\alpha$  0.05, and a power of 0.8, the minimum sample size was 28 patients in order to detect plasma ropivacaine levels 30% higher than scalp blocks, which would include the potentially toxic threshold of 2.2 µg ml<sup>-1</sup>.

## Results

We recruited 28 adult female patients. The median age was 43 yr (range, 19–86 yr) and the mean (SD) body weight was 67.1 (15.2) kg. The mean dose of ropivacaine administered was 201 (46) mg. All the patients underwent lower abdominal laparotomy for gynaecological procedures. The median surgical duration was 125 min (range, 71–206 min).

The time course of serum ropivacaine concentrations is shown in Figure 1. The mean peak total ropivacaine concentration was 2.54 (0.75) µg ml<sup>-1</sup>, which occurred at the 30 min measurement. The highest individual peak plasma concentration was 4.00 µg ml<sup>-1</sup>, also at 30 min after injection. Total mean concentrations remained above 2.20 µg ml<sup>-1</sup> up to 90 min post-injection. Median concentrations were above 2.20 µg ml<sup>-1</sup> for up to 45 min post-injection.

The mean unbound ropivacaine concentration measured at 30 min was 0.14 (0.05) µg ml<sup>-1</sup>. The median unbound concentration was 0.13 µg ml<sup>-1</sup>. The highest observed unbound ropivacaine concentration in any patient was 0.25 µg ml<sup>-1</sup>. Ten patients exceeded the potentially toxic threshold concentration of 0.15 µg ml<sup>-1</sup>.

We did not prospectively assess for subtle symptoms or clinical signs of neurological toxicity, but there were no seizures or persistent cardiovascular instability observed in any patient.

## Discussion

Plasma concentrations of ropivacaine after large volume blocks in relatively high blood flow tissues have been reported previously, including scalp blocks for awake craniotomy [1.5 (0.6) µg ml<sup>-1</sup>],<sup>8</sup> caudal [0.9 (0.31) µg ml<sup>-1</sup>],<sup>9</sup> and ilioinguinal blocks [1.5 (0.93) µg ml<sup>-1</sup>]<sup>10 11</sup> in children. Knudsen and colleagues<sup>12</sup> published a study of volunteers receiving titrated i.v. infusions of ropivacaine and revealed the onset of neurological symptoms at a mean total plasma venous concentration of 2.2 µg ml<sup>-1</sup> and an unbound ropivacaine concentration of 0.15 (0.08) µg ml<sup>-1</sup>. Many case reports have been published measuring ropivacaine concentrations in the setting of local anaesthetic toxicity. Measured concentrations in the setting of overdosage tend to be much higher than levels in the setting of accidental intravascular injection, where the rapid increase in plasma concentrations makes toxicity more likely.<sup>13</sup> For

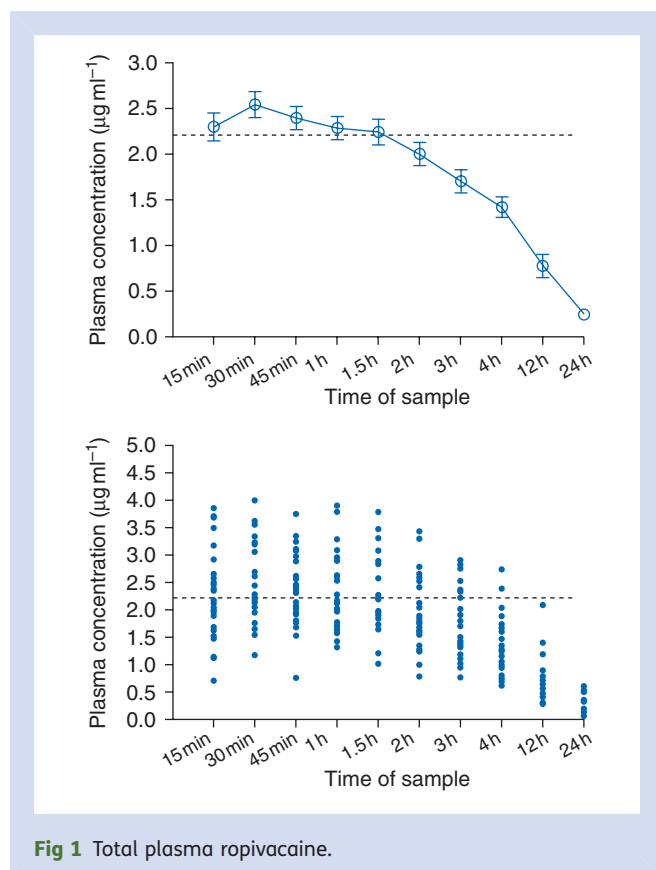

Fig 1 Total plasma ropivacaine.

example, a case where ropivacaine  $6 \text{ mg kg}^{-1}$  was injected as an interscalene nerve block resulted in an initial plasma concentration of  $6.0 \text{ µg ml}^{-1}$  and symptoms of neurological toxicity.<sup>14</sup> Whereas, brachial plexus block complicated by inadvertent intravascular injection (also with symptoms of neurological toxicity) resulted in measured plasma concentrations of only  $2.70\text{--}3.3 \text{ µg ml}^{-1}$ .<sup>15 16</sup>

This study revealed that mean peak total venous ropivacaine concentrations exceeded a potentially neurotoxic threshold value ( $2.2 \text{ µg ml}^{-1}$ ) after bilateral TAP block with  $3 \text{ mg kg}^{-1}$  ropivacaine at 15, 30, 60, and 90 min, with the highest individual value almost double this ( $4.0 \text{ µg ml}^{-1}$ ). The peak total concentrations found in our study exceeded those in previously published studies of scalp block for awake craniotomy,<sup>8</sup> ilioinguinal,<sup>10</sup> and caudal<sup>9</sup> blocks in children. The mean peak concentration was also higher than  $2.2 \text{ µg ml}^{-1}$ , which was the threshold level for the onset of minor neurotoxic symptoms as published by Knudsen and colleagues.<sup>12</sup> However, Knudsen's paper represents a different clinical scenario, where i.v. local anaesthetic infusions were titrated in volunteers, without supplemental anaesthetic agents which may reduce the likelihood of neurotoxic symptoms. Knudsen's study measured the onset of minor neurotoxic symptoms, rather than potentially life-threatening toxicity. There was also a marked arteriovenous difference in the samples, indicating high peripheral extraction in the limb used for measurement and making interpretation of the venous levels unreliable in respect of the venous levels

associated with toxicity in a clinical scenario with slower absorption.

Plasma ropivacaine levels have also been studied in the context of other common regional techniques with a low incidence of clinically important toxicity. These reveal a range of results broadly consistent with our findings. Mean peak plasma ropivacaine levels after ilioinguinal block were  $1.5 \text{ µg ml}^{-1}$  (maximum level  $2.6 \text{ µg ml}^{-1}$ ),<sup>17</sup> after axillary brachial plexus block  $2.58 \text{ µg ml}^{-1}$  (maximum level  $3.4 \text{ µg ml}^{-1}$ )<sup>18</sup> and a single epidural bolus of  $1.77 \text{ µg ml}^{-1}$  (maximum level  $2.94 \text{ µg ml}^{-1}$ ).<sup>19</sup>

In general, the free or unbound fraction of the drug is considered to be more predictive of toxicity than the total concentration. The median unbound venous concentration in our study ( $0.13 \text{ µg ml}^{-1}$ ) was lower than that which was associated with neurotoxicity in Knudsen's study in volunteers ( $0.15 \text{ µg ml}^{-1}$ ), although individual patients exceeded it.<sup>12</sup> Knudsen and colleagues, however, suggested that the peak unbound arterial concentration ( $0.56 \text{ µg ml}^{-1}$ ) may represent a more valid predictor of toxicity than the venous level due to the high peripheral extraction in their study.

In addition to the absolute plasma levels, the rate of increase in plasma local anaesthetic concentrations is implicated in resulting toxicity. In our study, plasma levels were seen to increase more slowly than in other settings. We found peak concentrations in most patients occurred at 30 min post-injection. This is slower than in the paravertebral block,<sup>20</sup> interscalene block,<sup>18</sup> and awake craniotomy,<sup>8</sup> where peak levels occurred at 7.5, 10, and 15 min, respectively. Our observed peak concentrations were also delayed compared with Knudsen's study, where infusions were stopped (with the onset of symptoms) after a median duration of 11.5 min. In contrast, after ilioinguinal block<sup>17</sup> and caudal anaesthesia in children,<sup>21</sup> peak venous levels were seen after 45 and 65 min, respectively.

In this study, we did not attempt to assess for clinical signs or symptoms of neurotoxicity. The duration of surgery in most patients exceeded the peak times that plasma concentrations were elevated. For this reason, we determined that it was highly unlikely that clinical neurotoxicity would be detected. This study does, however, have implications for TAP blocks performed at the conclusion of surgery for pain relief, or for brief operations, where potentially neurotoxic plasma concentrations could be present in conscious patients.

Also, the participants in this study were healthy adult female patients. It is possible that the measured concentrations would be different in males, children or the elderly, or in pregnancy (where levels of AAG are reduced and cardiac output is increased). Other conditions in which plasma concentrations may be unexpectedly increased could include renal or cardiac failure.<sup>22</sup>

Different anatomical locations display different pharmacokinetic characteristics influencing toxicity. Rosenberg and colleagues<sup>22</sup> propose that rather than publishing a single maximum safe dose of a local anaesthetic, dosage recommendations should be technique-specific. For example, different approaches to the brachial plexus result in

significantly different plasma concentrations of local anaesthetic.<sup>18</sup> Kato and colleagues suggest that local anaesthetic absorption after TAP block may in part result from leakage of injectate from the TAP out into the surrounding abdominal musculature. It is possible that ultrasound guidance may actually increase the accuracy of injection and decrease plasma levels compared with a blind technique.<sup>7</sup> Although we believe that clinically important toxicity with this technique is unlikely, the findings in our study raise the possibility that a dose of 3 mg kg<sup>-1</sup> may be excessive in some patients. Consideration should be given to dose reduction, especially if there are medical conditions that may increase the unbound fraction of drug or increase the rate of absorption.

In conclusion, this study demonstrates that the use of 3 mg kg<sup>-1</sup> of ropivacaine in the TAP block in adult females results in potentially toxic plasma concentrations of ropivacaine.

## Acknowledgements

We wish to acknowledge Mr Hervey Lau, University of Melbourne Medical Student, the medical staff of the Royal Women's Hospital Anaesthetic Department, and the nurses of the Acute Pain Service for their assistance taking blood samples for this project.

## Conflict of interest

None declared.

## Funding

Internal funding was provided by the Department of Anaesthesia, Royal Women's Hospital and the Anaesthesia and Pain Management Unit, Department of Pharmacology, University of Melbourne.

## References

- Hebbard P. Audit of 'rescue' analgesia using TAP block. *Anaesth Intensive Care* 2007; **35**: 617–8
- Hebbard P, Fujiwara Y, Shibata Y, Royse C. Ultrasound-guided transversus abdominis plane (TAP) block. *Anaesth Intensive Care* 2007; **35**: 616–7
- McDonnell JG, Laffey JG. Transversus abdominis plane block. *Anesth Analg* 2007; **105**: 883
- McDonnell JG, O'Donnell B, Curley G, Heffernan A, Power C, Laffey JG. The analgesic efficacy of transversus abdominis plane block after abdominal surgery: a prospective randomized controlled trial. *Anesth Analg* 2007; **104**: 193–7
- O'Donnell BD, McDonnell JG, McShane AJ. The transversus abdominis plane (TAP) block in open retropubic prostatectomy. *Reg Anesth Pain Med* 2006; **31**: 91
- Behnke H, Worthmann F, Cornelissen J, Kahl M, Wulf H. Plasma concentration of ropivacaine after intercostal blocks for video-assisted thoracic surgery. *Br J Anaesth* 2002; **89**: 251–3
- Kato N, Fujiwara Y, Harato M, et al. Serum concentration of lidocaine after transversus abdominis plane block. *J Anesth* 2009; **23**: 298–300
- Costello TG, Cormack JR, Hoy C, et al. Plasma ropivacaine levels following scalp block for awake craniotomy. *J Neurosurg Anesthesiol* 2004; **16**: 147–50
- Bosenberg AT, Thomas J, Lopez T, Huledal G, Jeppsson L, Larsson LE. Plasma concentrations of ropivacaine following a single-shot caudal block of 1, 2 or 3 mg/kg in children. *Acta Anaesthesiol Scand* 2001; **45**: 1276–80
- Dalens B, Ecoffey C, Joly A, et al. Pharmacokinetics and analgesic effect of ropivacaine following ilioinguinal/iliohypogastric nerve block in children. *Paediatr Anaesth* 2001; **11**: 415–20
- Ala-Kokko TI, Karinen J, Raiha E, Kiviluoma K, Alahuhta S. Pharmacokinetics of 0.75% ropivacaine and 0.5% bupivacaine after ilioinguinal–iliohypogastric nerve block in children. *Br J Anaesth* 2002; **89**: 438–41
- Knudsen K, Beckman Suurkula M, Blomberg S, Sjøvall J, Edvardsson N. Central nervous and cardiovascular effects of i.v. infusions of ropivacaine, bupivacaine and placebo in volunteers. *Br J Anaesth* 1997; **78**: 507–14
- Chazalon P, Tourtier JP, Villevielle T, et al. Ropivacaine-induced cardiac arrest after peripheral nerve block: successful resuscitation. *Anesthesiology* 2003; **99**: 1449–51
- Ala-Kokko TI, Loppinen A, Alahuhta S. Two instances of central nervous system toxicity in the same patient following repeated ropivacaine-induced brachial plexus block. *Acta Anaesthesiol Scand* 2000; **44**: 623–6
- Raeder JC, Drosdahl S, Klaastad O, et al. Axillary brachial plexus block with ropivacaine 7.5 mg/ml. A comparative study with bupivacaine 5 mg/ml. *Acta Anaesthesiol Scand* 1999; **43**: 794–8
- Muller M, Litz RJ, Huler M, Albrecht DM. Grand mal convulsion and plasma concentrations after intravascular injection of ropivacaine for axillary brachial plexus blockade. *Br J Anaesth* 2001; **87**: 784–7
- Wulf H, Behnke H, Vogel I, Schroder J. Clinical usefulness, safety, and plasma concentration of ropivacaine 0.5% for inguinal hernia repair in regional anesthesia. *Reg Anesth Pain Med* 2001; **26**: 348–51
- Rettig HC, Lerou JG, Gielen MJ, Boersma E, Burm AG. The pharmacokinetics of ropivacaine after four different techniques of brachial plexus blockade. *Anaesthesia* 2007; **62**: 1008–14
- Sandler AN, Arlander E, Finucane BT, et al. Pharmacokinetics of three doses of epidural ropivacaine during hysterectomy and comparison with bupivacaine. *Can J Anaesth* 1998; **45**: 843–9
- Karmakar MK, Ho AM, Law BK, Wong AS, Shafer SL, Gin T. Arterial and venous pharmacokinetics of ropivacaine with and without epinephrine after thoracic paravertebral block. *Anesthesiology* 2005; **103**: 704–11
- Karmakar MK, Aun CS, Wong EL, Wong AS, Chan SK, Yeung CK. Ropivacaine undergoes slower systemic absorption from the caudal epidural space in children than bupivacaine. *Anesth Analg* 2002; **94**: 259–65, table of contents.
- Rosenberg PH, Veering BT, Urmev WF. Maximum recommended doses of local anesthetics: a multifactorial concept. *Reg Anesth Pain Med* 2004; **29**: 564–75; discussion 524.
